# Supplementary material for: Croatian freshwater bryoflora–diversity and distribution
Source: Biodivers Data J. 2022 May 25;10:e83902. doi: 10.3897/BDJ.10.e83902 (PMC9848551; doi:10.3897/BDJ.10.e83902)
Supplement: Supplementary material 1 — Complete list of the freshwater bryoflora of Croatia with distribution data, chorological and life-trait information on the species and altitude and climatological data of the sites. [file bdj-10-e83902-s001.xlsx]

## Sheet: Species data
					X_WGS	14.8504	15.7539	15.2493	15.3564	15.6182	15.0078	15.4758	15.9099	17.2469	15.4311	16.1595	16.1691	16.8089	15.6014	15.3556	15.7552	16.1227	15.2456	15.6186	15.5952	15.5952	15.5952	15.818	16.2012	15.8228	16.3571	16.0692	15.3143	15.694	16.1616	16.5972	16.7737	17.2725	17.1228	16.4105	17.3763	15.7409	18.648	16.1329	16.0504	13.7378	13.9389	13.9033	13.8563
					Y_WGS	45.4396	46.174	45.4557	45.6453	45.6052	45.4243	45.5306	45.2668	45.9993	45.1952	46.0588	46.241	46.3382	44.8434	45.3728	46.0752	46.0515	45.0312	44.9259	45.3917	45.3917	45.3917	45.9345	46.1048	45.8348	45.4396	46.0542	45.6091	45.4583	46.0322	46.429	45.3561	45.6599	45.2973	43.7052	45.3645	45.0635	45.6089	46.2516	46.2348	45.3575	45.3983	45.3955	45.3606
					Name	Delnički potok	Kosteljina	Kupa	Kupa	Kupčina	Sušica	Tomašnica	Perna	Rogstrug	Mrežnica	Batina	Bednja	Rakovnica	Crna Rijeka	Dobra	Horvatska	Ivanec	Jaruga	Korana	Korana	Korana	Korana	Krapina	Krapina	Krapina	Moštanica	Reka II	Ribnik	Utinja 1	Žitomirka	Boščak - kanal	Trebež	Ilova	Rajić	Suvova	Šumetlica	Korana	Bistra III	Voća	Žarovnica	Mirna	Mirna	Bračana	Stara Mirna
					water body type	watercourse	watercourse	watercourse	watercourse	watercourse	watercourse	watercourse	watercourse	watercourse	watercourse	watercourse	watercourse	watercourse	watercourse	watercourse	watercourse	watercourse	watercourse	watercourse	watercourse	watercourse	watercourse	watercourse	watercourse	watercourse	watercourse	watercourse	watercourse	watercourse	watercourse	watercourse	watercourse	watercourse	watercourse	watercourse	watercourse	watercourse	watercourse	watercourse	watercourse	watercourse	watercourse	watercourse	watercourse
life strategy	life-form	chorotype (major biom)	chorotype (eatern limit)	Family	(sub) ecoregion	DIN CON	PAN	DIN CON	DIN CON	PAN	DIN CON	DIN CON	PAN	PAN	DIN CON	PAN	PAN	PAN	DIN CON	DIN CON	PAN	PAN	DIN CON	DIN CON	DIN CON	DIN CON	DIN CON	PAN	PAN	PAN	PAN	PAN	DIN CON	PAN	PAN	PAN	PAN	PAN	PAN	DIN MED	PAN	DIN CON	PAN	PAN	PAN	DIN MED	DIN MED	DIN MED	DIN MED
c	Mt	Southern-temperate	Circumpolar	Pelliaceae	Apopellia endiviifolia (Dicks.) Nebel & D.Quandt																			+			1									2a
c	Tf	Wide-temperate	Circumpolar	Pottiaceae	Barbula unguiculata Hedw.		+
p	Mr	Temperate	Circumpolar	Brachytheciaceae	Brachythecium mildeanum (Schimp.) Schimp.
pc	Mr	Boreo-temperate	Circumpolar	Brachytheciaceae	Brachythecium rivulare Schimp.
cp	Mr	Temperate	European	Brachytheciaceae	Brachythecium rutabulum (Hedw.) Schimp.																																			+
cp	Mr	Wide-boreal	Circumpolar	Brachytheciaceae	Brachythecium salebrosum (Hoffm. ex F.Weber et D.Mohr) Schimp.
c	Tf	Boreo-temperate	Circumpolar	Pottiaceae	Bryoerythrophyllum recurvirostrum (Hedw.) P.C.Chen
c	Tf	Wide-boreal	Circumpolar	Bryaceae	Bryum argenteum Hedw.		+														+
c	Tf	Wide-temperate	European	Bryaceae	Bryum barnesii J.B. Wood ex Schimp.
c	Tf	Wide-temperate	European	Bryaceae	Bryum dichotomum Hedw.		+
ce	Tf	Temperate	European	Bryaceae	Bryum klinggraeffii Schimp.
pc	Tf	Wide-boreal	Circumpolar	Bryaceae	Ptychostomum (Hedw.) J.R.Spence & H.P.Ramsay ex Holyoak & N.Pedersen																			1
ce	Tf	Temperate	European	Bryaceae	Bryum ruderale Crundw. & Nyholm
pc	We	Temperate	Circumpolar	Pylaisiaceae Schimp.	Calliergonella cuspidata (Hedw.) Loeske
pc	Tf	Boreo-temperate	Circumpolar	Lophocoleaceae	Chiloscyphus pallescens (Ehrh.) Dumort.
pc	At	Boreo-temperate	Circumpolar	Lophocoleaceae	Chiloscyphus polyanthos (L.) Corda
c	At	Southern-temperate	European	Pottiaceae	Cinclidotus aquaticus (Hedw.) Bruch & Schimp.	2a		3	3																		1
c	At	Southern-temperate	European	Pottiaceae	Cinclidotus fontinaloides (Hedw.) P.Beauv.	1		2m	2m	+					1					1
c	At	Temperate	Eurosiberian	Pottiaceae	Cinclidotus riparius (Host ex Brid.) Arn.	2m		2m	2m	+										1							2m						+
l	Mt	Boreo-temperate	Circumpolar	Conocephalaceae	Conocephalum salebrosum Szweyk., Buczk. & Odrzyk.		1
pc	We	Wide-temperate	Circumpolar	Amblystegiaceae	Cratoneuron filicinum (Hedw.) Spruce	1	1		+		+								2a								2m
c	Tf	Boreal-montane	European	Amphidiaceae	Dichodontium flavescens (Dicks.) Lindb.
cp	Tf	Boreo-arctic montane	Circumpolar	Amphidiaceae	Dichodontium pellucidum (Hedw.) Schimp.
ce	Tf	Boreo-temperate	Circumpolar	Amphidiaceae	Dicranella varia (Hedw.) Schimp.																																	+	+
c	Tf	Southern-temperate	Circumpolar	Pottiaceae	Didymodon fallax (Hedw.) R.H.Zander
c	Tf	Southern-temperate	Eurasian	Pottiaceae	Didymodon insulanus (De Not.) M.O.Hill
c	Tf	Mediterranean-Atlantic	Suboceanic	Pottiaceae	Didymodon luridus Hornsch.
c	Tf	Temperate	European	Pottiaceae	Didymodon spadiceus (Mitt.) Limpr.
c	Tf	Southern-temperate	European	Pottiaceae	Didymodon tophaceus (Brid.) Lisa																			2a			2b
p	We	Boreo-temperate	Circumpolar	Amblystegiaceae	Drepanocladus aduncus (Hedw.) Warnst.
ps	Tuft	Southern-temperate	European	Pottiaceae	Eucladium verticillatum (With.) Bruch & Schimp.																			1
c	Tuft	Boreo-temperate	Circumpolar	Fissidentaceae	Fissidens adianthoides Hedw.								+
s	Tf	Temperate	Circumpolar	Fissidentaceae	Fissidens arnoldii R.Ruthe
l	Tf	Southern-temperate	European	Fissidentaceae	Fissidens crassipes Wilson ex Bruch & Schimp.		1	1	+																		1		2a
c	At	Temperate	European	Fissidentaceae	Fissidens fontanus (Bach.Pyl.) Steud.
c	Ts	Southern-temperate	European	Fissidentaceae	Fissidens gracilifolius Brugg.-Nann. & Nyholm
ce	Ts	Southern-temperate	European	Fissidentaceae	Fissidens pusillus (Wilson) Milde																																				1
c	Tf	Southern-temperate	European	Fissidentaceae	Fissidens taxifolius Hedw.
p	At	Boreo-temperate	Circumpolar	Fontinalaceae	Fontinalis antipyretica Hedw.	1			+	2m			+		2m		+			2b			1		1	+						1		2m								2a			+	2m	1	1	1
p	At	Wide-temperate	Circumpolar	Fontinalaceae	Fontinalis hypnoides Hartm. var. duriaei (Schimp.) Kindb.
f	Tuft	Wide-temperate	Circumpolar	Funariaceae	Funaria hygrometrica Hedw.		+																	1
cp	Tf	Boreo-temperate	Circumpolar	Pottiaceae	Gymnostomum aeruginosum Sm.																			1
p	Mr	Boreo-temperate	European	Amblystegiaceae	Hygroamblystegium fluviatile (Hedw.) Loeske
p	Mr	Temperate	Circumpolar	Amblystegiaceae	Hygroamblystegium humile (P.Beauv.) Vanderp., Goffinet & Hedenäs
P	Mr	Temperate	Circumpolar	Amblystegiaceae	Hygroamblystegium tenax (Hedw.) Jenn.
p	Mr	Temperate	Circumpolar	Amblystegiaceae	Hygroamblystegium varium (Hedw.) Mönk.	1
p	Mr	Boreo-temperate	Circumpolar	Amblystegiaceae	Hygrohypnum luridum (Hedw.) Jenn.			2m
c	Tf	Boreo-temperate	Circumpolar	Pottiaceae	Hymenostylium recurvirostrum (Hedw.) Dixon
c	Ms	Wide-boreal	European	Jungermanniaceae	Jungermannia atrovirens Dumort.
f	Tuft	Wide-temperate	Circumpolar	Meesiaceae	Leptobryum pyriforme (Hedw.) Wilson
p	Mr	Temperate	Circumpolar	Amblystegiaceae	Leptodictyum riparium (Hedw.) Warnst.	1	2m					1		1		+				1		+	1					1	2b	2a	1	1		+	2m									5		2a
p	Mr	Temperate	Circumpolar	Leskeaceae Schimp.	Leskea polycarpa Hedw.
pc	We	Temperate	European	Lophocoleaceae	Lophocolea bidentata (L.) Dumort.
p	Mt	Mediterranean-Atlantic	Suboceanic	Lunulariaceae	Lunularia cruciata (L.) Dumort. ex Lindb.																																	+
c	Mt	Boreo-temperate	Circumpolar	Marchantiaceae	Marchantia polymorpha L.	+
l	Tf	Boreo-temperate	Circumpolar	Mniaceae	Mnium marginatum (Dicks.) P.Beauv.
cp	Mr	Temperate	Circumpolar	Brachytheciaceae	Oxyrrhynchium hians (Hedw.) Loeske
p	Mr	Mediterranean-Atlantic	Suboceanic	Brachytheciaceae	Oxyrrhynchium schleicheri (R.Hedw.) Röll
p	Mr	Temperate	European	Brachytheciaceae	Oxyrrhynchium speciosum (Brid.) Warnst.				+
pc	We	Boreo-temperate	Eurosiberian	Amblystegiaceae	Palustriella commutata (Hedw.) Ochyra																														2m
pc	We	Boreo-temperate	Circumpolar	Amblystegiaceae	Palustriella falcata (Brid.) Hedenäs																			2m
c	Mt	Boreo-temperate	Circumpolar	Pelliaceae	Pellia neesiana (Gottsche) Limpr.																																		+
l	Tf	Southern-temperate	European	Bartramiaceae	Philonotis marchica (Hedw.) Brid.
a	Ts	Temperate	Eurosiberian	Funariaceae	Physcomitrium patens (Hedw.) Mitt.																																2m	+	+
a	Tf	Temperate	Eurasian	Funariaceae	Physcomitrium eurystomum Sendtn.
a	Tf	Temperate	Eurasian	Funariaceae	Physcomitrium sphaericum (C.F.Ludw. ex Schkur.) Brid.
pc	Ms	Temperate	European	Mniaceae	Plagiomnium affine (Blandow ex Funck) T.J.Kop.
pc	Tf	Boreo-temperate	European	Mniaceae	Plagiomnium elatum (Bruch et Schimp.) T.J.Kop.
pc	Tf	Boreo-arctic montane	Circumpolar	Mniaceae	Plagiomnium ellipticum (Brid.) T.J.Kop.
pc	Tf	Temperate	European	Mniaceae	Plagiomnium undulatum (Hedw.) T.J.Kop.
c	Tf	Southern-temperate	Circumpolar	Mniaceae	Pohlia melanodon (Brid.) A.J.Shaw																																	+	+
l	Tf	Boreo-temperate	Circumpolar	Mniaceae	Rhizomnium punctatum (Hedw.) T.J.Kop.
ps	Ms	Mediterranean-Atlantic	Oceanic	Brachytheciaceae	Rhynchostegiella curviseta (Brid.) Limpr.
ps	Ms	Mediterranean-Atlantic	Suboceanic	Brachytheciaceae	Rhynchostegiella teneriffae (Mont.) Dirkse & Bouman
p	Ms	Southern-temperate	Circumpolar	Brachytheciaceae	Rhynchostegium riparioides (Hedw.) Cardot	1	2m	2a	2a						1				1	1				2a			2b		2b						2m			1			1
a	St	Temperate	Circumpolar	Ricciaceae	Riccia cavernosa Hoffm.																																2m
a	Le	Southern-temperate	Circumpolar	Ricciaceae	Riccia fluitans L.																																						1
a	St	Southern-temperate	Circumpolar	Ricciaceae	Riccia frostii Austin
a	St	Southern-temperate	Circumpolar	Ricciaceae	Riccia glauca L.
a	Le	Temperate	European	Ricciaceae	Riccia rhenana Lorb. ex Müll.Frib.
a	Le	Southern-temperate	Circumpolar	Ricciaceae	Ricciocarpos natans (L.) Corda													1
p	De	Temperate	European	Neckeraceae	Thamnobryum alopecurum (Hedw.) Gangulee
p	Tf	Mediterranean-Atlantic	Suboceanic	Pottiaceae	Trichostomum crispulum Bruch
[truncated: 184 more columns]

## Sheet: Abiotic data
X_WGS	Y_WGS	Name	water body type	(sub) ecoregion	Altitude (m a.s.l.)	Mean annual air temperature (°C)	Mean temperature of wettest quarter (°C)	Mean temperature of driest quarter (°C)	Annual precipitation (kg/m2)
14.8504	45.4396	Delnički potok	watercourse	DIN CON	239.106	11.05	11.35	2.75	1536.8
15.7539	46.174	Kosteljina	watercourse	PAN	206.775	10.95	20.35	2.85	1061.9
15.2493	45.4557	Kupa	watercourse	DIN CON	161.634	11.45	11.75	3.35	1178.3
15.3564	45.6453	Kupa	watercourse	DIN CON	130.964	11.65	16.75	3.45	1090.6
15.6182	45.6052	Kupčina	watercourse	PAN	114.329	11.75	17.05	3.45	1009.7
15.0078	45.4243	Sušica	watercourse	DIN CON	423.22	9.85	10.25	1.75	1584.7
15.4758	45.5306	Tomašnica	watercourse	DIN CON	119.917	11.75	16.95	3.55	1160.2
15.9099	45.2668	Perna	watercourse	PAN	131.804	11.75	11.95	3.75	1107
17.2469	45.9993	Rogstrug	watercourse	PAN	108.869	11.55	21.25	3.15	780.2
15.4311	45.1952	Mrežnica	watercourse	DIN CON	186.358	11.35	11.65	3.25	1368.8
16.1595	46.0588	Batina	watercourse	PAN	166.063	11.45	19.95	3.25	893.7
16.1691	46.241	Bednja	watercourse	PAN	200.721	11.15	20.55	2.95	950.1
16.8089	46.3382	Rakovnica	watercourse	PAN	135.56	11.35	20.95	3.15	752.3
15.6014	44.8434	Crna Rijeka	watercourse	DIN CON	646.181	9.15	9.65	18.25	1792.5
15.3556	45.3728	Dobra	watercourse	DIN CON	142.041	11.65	11.85	3.55	1285.4
15.7552	46.0752	Horvatska	watercourse	PAN	153.98	11.45	20.95	3.25	1018.7
16.1227	46.0515	Ivanec	watercourse	PAN	161.27	11.45	19.95	3.25	889.3
15.2456	45.0312	Jaruga	watercourse	DIN CON	489.913	10.05	10.45	1.85	1615.6
15.6186	44.9259	Korana	watercourse	DIN CON	400.789	10.25	10.65	2.25	1697.6
15.5952	45.3917	Korana	watercourse	DIN CON	115.356	11.65	11.85	3.55	1160.1
15.5952	45.3917	Korana	watercourse	DIN CON	115.356	11.65	11.85	3.55	1160.1
15.5952	45.3917	Korana	watercourse	DIN CON	115.356	11.65	11.85	3.55	1160.1
15.818	45.9345	Krapina	watercourse	PAN	132.398	11.65	16.95	3.45	1007.1
16.2012	46.1048	Krapina	watercourse	PAN	175.47	11.35	20.85	3.15	919.2
15.8228	45.8348	Krapina	watercourse	PAN	121.519	11.75	16.95	3.35	916.6
16.3571	45.4396	Moštanica	watercourse	PAN	98.6696	12.05	12.15	3.85	923.5
16.0692	46.0542	Reka II	watercourse	PAN	158.907	11.55	20.15	3.25	903.1
15.3143	45.6091	Ribnik	watercourse	DIN CON	134.051	11.65	16.85	3.45	1069
15.694	45.4583	Utinja 1	watercourse	PAN	113.421	11.85	11.95	3.55	1048.8
16.1616	46.0322	Žitomirka	watercourse	PAN	165.723	11.35	19.95	3.25	915.9
16.5972	46.429	Boščak - kanal	watercourse	PAN	146.806	11.35	20.85	3.05	778.4
16.7737	45.3561	Trebež	watercourse	PAN	98.517	12.15	12.35	3.95	897.3
17.2725	45.6599	Ilova	watercourse	PAN	136.487	11.65	19.65	3.45	930.9
17.1228	45.2973	Rajić	watercourse	PAN	116.934	12.15	20.25	3.75	879
16.4105	43.7052	Suvova	watercourse	DIN MED	428.273	12.55	8.85	21.45	1211.3
17.3763	45.3645	Šumetlica	watercourse	PAN	397.726	9.95	17.55	2.05	1159.8
15.7409	45.0635	Korana	watercourse	DIN CON	243.701	11.35	11.65	3.35	1269.7
18.648	45.6089	Bistra III	watercourse	PAN	84.2007	11.85	21.75	3.15	693.2
16.1329	46.2516	Voća	watercourse	PAN	203.744	11.05	20.55	2.95	937.9
16.0504	46.2348	Žarovnica	watercourse	PAN	216.818	10.95	20.35	2.85	1008.3
13.7378	45.3575	Mirna	watercourse	DIN MED	0.738	14.55	15.15	6.95	1202.2
13.9389	45.3983	Mirna	watercourse	DIN MED	34.2458	13.55	13.95	5.85	1409.4
13.9033	45.3955	Bračana	watercourse	DIN MED	25.8165	13.95	14.35	6.25	1427
13.8563	45.3606	Stara Mirna	watercourse	DIN MED	12.4806	14.45	14.85	6.75	1225.9
14.0241	45.0954	Raša	watercourse	DIN MED	1.027	14.65	15.45	7.45	1298.8
13.9664	45.2472	Pazinčica	watercourse	DIN MED	248.756	13.15	13.75	5.75	1269.2
17.7272	45.0955	Orljava	watercourse	PAN	89.8088	12.15	20.35	3.75	886.1
16.5498	45.2221	Una	watercourse	PAN	104.987	11.95	12.05	3.85	1019.5
15.4619	44.2132	Baščica	watercourse	DIN MED	2.16746	14.75	10.45	24.35	1282.5
15.6755	45.8411	Bregana	watercourse	DIN CON	153.684	11.15	16.35	2.95	1138.2
15.3433	45.0744	Dretulja	watercourse	DIN CON	379.97	9.85	10.25	1.75	1801.9
15.4239	45.0658	Dretulja	watercourse	DIN CON	364.595	10.65	11.05	2.55	1620.3
15.7297	43.9541	Jaruga 3	watercourse	DIN MED	109.666	14.65	10.75	23.85	1017.2
15.3302	44.2632	Jaruga 2	watercourse	DIN MED	30.9614	14.55	10.55	23.75	1325.4
15.4511	45.7216	Kupčina	watercourse	DIN CON	218.665	11.05	16.15	2.95	1222.4
17.8601	45.482	Velika Rijeka	watercourse	PAN	547.257	9.15	18.25	1.25	1103.2
15.667	45.7627	Rudarska Gradna	watercourse	DIN CON	290.07	10.35	15.55	2.35	1323.4
15.6974	45.8	Rudarska Gradna	watercourse	DIN CON	169.851	10.95	16.15	2.85	1171.9
15.7023	45.7995	Gradna	watercourse	DIN CON	165.531	10.95	16.15	2.75	1175.9
15.6454	45.7868	Lipovečka Gradna	watercourse	DIN CON	241.88	10.75	15.95	2.65	1287.1
16.531	45.3089	Svinica	watercourse	PAN	120.391	11.85	11.95	3.65	957.1
15.6028	45.8368	Bregana	watercourse	DIN CON	222.886	10.65	15.75	2.65	1225.7
13.9292	45.2402	Pazinčica	watercourse	DIN MED	194.18	12.95	13.65	5.65	1242.7
15.5015	45.6882	Slapnica	watercourse	DIN CON	167.05	11.35	16.55	3.15	1071
16.9745	45.3979	Subocka	watercourse	PAN	123.834	12.05	12.15	3.75	948.4
16.1059	44.4019	Una	watercourse	DIN CON	387.001	11.15	6.85	20.35	1248.4
15.9556	44.6968	Una	watercourse	DIN CON	235.894	11.25	11.55	20.45	1384.3
16.1451	44.4204	Izvor Krke	watercourse	DIN CON	371.403	11.45	7.05	20.75	1055
16.4281	43.9695	Cetina	watercourse	DIN MED	373.954	12.45	8.05	22.05	1184.9
16.4425	43.9361	Cetina	watercourse	DIN MED	370.095	12.35	8.05	22.05	1188.4
14.6944	45.1769	Dubračana	watercourse	DIN MED	3.34264	13.45	13.75	22.85	1735.6
16.5155	46.1331	Kamešnica	watercourse	PAN	211.906	10.95	20.35	2.75	1033.3
16.2252	44.0401	Krka	watercourse	DIN MED	217.529	13.35	9.05	23.05	1245
15.8869	44.1912	Krupa	watercourse	DIN MED	105.44	13.75	9.05	23.45	1174.8
15.8869	44.1912	Krupa	watercourse	DIN MED	105.44	13.75	9.05	23.45	1174.8
15.9094	44.1928	Krupa	watercourse	DIN MED	123.291	13.45	8.85	23.15	1210.9
18.137	42.6761	Ombla	watercourse	DIN MED	15.6647	14.65	11.75	22.45	1881.1
16.6481	43.7762	Rumin	watercourse	DIN MED	299.257	12.95	8.65	22.45	1077.8
16.3726	45.0498	Una	watercourse	PAN	117.888	11.95	12.05	3.85	1079.2
16.6319	43.7571	Vojskova	watercourse	DIN MED	305.091	13.05	8.85	22.55	1111.9
16.4	43.7224	Vrba	watercourse	DIN MED	413.948	12.85	8.95	21.85	1205.3
16.4292	43.9367	Zduški potok	watercourse	DIN MED	373.034	12.45	8.05	22.05	1237.1
15.38	45.3732	Globornica	watercourse	DIN CON	139.25	11.55	11.85	3.55	1260
15.1633	45.2836	Vitunjčica	watercourse	DIN CON	334.911	10.65	10.95	2.55	1566.1
15.566	43.9493	Mačavarina Draga	watercourse	DIN MED	44.5288	15.45	11.55	24.65	1002.8
15.2863	45.2851	Bistrica 1	watercourse	DIN CON	202.943	11.35	11.65	3.25	1432.4
15.2857	45.1872	Munjava	watercourse	DIN CON	334.23	10.85	11.15	2.75	1576.2
15.297	45.2037	Munjava	watercourse	DIN CON	323.383	10.85	11.15	2.85	1543.2
16.2201	44.0892	Butižnica	watercourse	DIN MED	241.298	13.25	8.85	22.85	1239
14.7417	44.9694	Suha Ričina Baščanska	watercourse	DIN MED	8.99157	14.25	14.95	23.05	2062
15.7759	44.1955	Zrmanja	watercourse	DIN MED	14.028	14.05	9.35	24.05	1204.3
15.8577	44.162	Zrmanja	watercourse	DIN MED	50.0252	14.15	9.45	24.05	1165.6
15.4395	44.2197	Baščica	watercourse	DIN MED	34.3579	14.45	10.25	23.95	1297.8
14.7309	45.3037	Potkoš	watercourse	DIN MED	711.679	9.05	9.65	18.05	2219.2
16.7583	43.4368	Cetina	watercourse	DIN MED	8.17713	15.55	12.25	23.85	1038.4
17.1593	46.0562	Bistra	watercourse	PAN	109.515	11.55	21.25	3.15	781.7
18.6165	45.6229	Kanal Halašica	watercourse	PAN	84.1493	11.75	21.65	3.15	693.7
18.5561	45.6915	Kanal VI.	watercourse	PAN	84.3511	11.75	21.55	3.15	676.4
16.3385	46.326	Drava	watercourse	PAN	167.374	11.15	20.65	2.95	849.1
14.8929	45.4273	Curak	watercourse	DIN CON	297.282	10.05	10.45	2.05	1543.1
14.8766	45.4456	Curak	watercourse	DIN CON	250.86	10.95	11.35	2.75	1413.2
17.1347	43.4956	Suvaja	watercourse	DIN MED	391.803	12.55	8.25	21.95	1268.8
16.7009	43.4565	Cetina	watercourse	DIN MED	4.20309	15.75	12.65	23.95	1025.8
16.0171	43.9952	Krka	watercourse	DIN MED	79.3632	14.15	9.85	23.65	1123.4
15.2235	44.8624	Kanal Gacka	watercourse	DIN CON	445.797	10.75	11.15	20.25	1531.1
16.7822	43.6723	Odvodni kanal HE Orlovac	watercourse	DIN MED	301.606	13.15	9.15	22.35	1206.9
13.9252	45.387	Mirna	watercourse	DIN MED	28.3526	13.95	14.35	6.15	1405.4
16.2262	44.1094	Butiznica	watercourse	DIN MED	310.024	12.85	8.45	22.35	1262.4
16.891	43.4218	Zvizda	watercourse	DIN MED	108.503	15.05	11.45	23.75	1248.5
16.891	43.4218	Zvizda	watercourse	DIN MED	108.503	15.05	11.45	23.75	1248.5
15.6871	44.3651	Ričica	watercourse	DIN CON	567.387	10.75	6.55	20.05	1384.2
14.6504	45.2315	Dubračina	watercourse	DIN MED	72.7724	13.05	13.45	22.45	1908.8
14.6801	45.2149	Dubračina	watercourse	DIN MED	45.9431	12.95	13.35	22.35	1862.8
13.8453	45.3485	Obuhvatni kanal Mufrin	watercourse	DIN MED	10.6241	14.55	15.05	6.85	1191.7
15.1262	44.945	Gusić	watercourse	DIN CON	435.537	10.75	11.25	20.35	1542
14.6761	45.2197	Dubračina	watercourse	DIN MED	50.8943	13.15	13.55	22.65	1913.6
16.2205	44.0962	Butižnica	watercourse	DIN MED	309.552	13.05	8.65	22.55	1240.8
17.3832	45.3473	Šumetlica	watercourse	PAN	314.321	10.55	18.25	2.45	1090
17.8199	45.2933	Vrbova	watercourse	PAN	119.824	11.95	20.05	3.45	838.8
17.9001	45.3388	Kutjevačka rijeka	watercourse	PAN	130.737	11.75	19.95	3.25	831.5
17.9319	45.112	Kanal Bistra	watercourse	PAN	88.4167	12.05	20.25	3.55	772.6
17.8304	45.2957	Skočinovac	watercourse	PAN	121.071	11.85	20.05	3.35	829.5
17.7523	45.3472	Vetovka	watercourse	PAN	137.166	11.75	19.95	3.35	814.1
17.728	45.3554	Kaptolka	watercourse	PAN	144.327	11.75	19.95	3.35	804.4
17.5926	45.3492	Peranački potok	watercourse	PAN	166.079	11.65	19.75	3.25	847
17.5926	45.3492	Peranački potok	watercourse	PAN	166.079	11.65	19.75	3.25	847
16.938	45.5687	Garešnica	watercourse	PAN	110.549	11.95	17.25	3.75	890.9
17.1865	45.5165	Jovača	watercourse	PAN	144.053	11.85	19.85	3.65	995.6
16.6993	45.901	Velika	watercourse	PAN	108.135	11.75	16.95	3.55	812
16.9689	45.3507	Brestača	watercourse	PAN	121.356	11.95	19.95	3.65	904.2
16.8376	45.3076	Veliki Strug	watercourse	PAN	90.8343	12.25	12.35	3.85	889.1
16.3455	45.0781	Javošnica	watercourse	PAN	122.813	11.85	12.05	3.75	1059.8
16.4435	45.1419	Čatlan	watercourse	PAN	117.229	11.95	12.05	3.85	1029.9
15.7149	46.0593	Sutla	watercourse	PAN	165.393	11.15	16.25	3.05	1091.6
16.0831	46.378	Posalitva	watercourse	PAN	200.359	11.05	20.55	2.95	924.5
15.7337	44.741	Matica 1	watercourse	DIN CON	641.081	9.55	10.05	18.45	1552.8
15.7658	44.544	Krbava	watercourse	DIN CON	703.361	9.45	5.45	18.45	1466.2
13.9292	45.2402	Pazinčica	watercourse	DIN MED	194.18	12.95	13.65	5.65	1242.7
16.7291	43.6176	Cetina	watercourse	DIN MED	294.385	13.75	9.95	22.65	1256.5
16.4909	43.5339	Jadro	watercourse	DIN MED	1.55545	15.85	12.75	23.85	1092.1
16.5421	43.5163	Žrnovnica	watercourse	DIN MED	9.53731	15.15	12.25	23.15	1165.4
16.7473	43.5319	Cetina	watercourse	DIN MED	243.496	14.15	10.75	22.75	1285.7
16.319	44.0274	Krčić	watercourse	DIN MED	354.487	12.45	8.15	21.95	1238.8
15.9892	43.9621	Krka	watercourse	DIN MED	90.5538	14.45	10.25	23.95	1100.8
17.1954	43.4313	Vrljika	watercourse	DIN MED	264.507	13.55	9.15	23.15	1170.2
18.3766	42.5217	Kopačica	watercourse	DIN MED	60.2487	16.25	13.45	23.95	2313
16.2731	45.4413	Petrinjčica	watercourse	PAN	97.1333	12.05	12.25	3.85	995.7
16.2056	44.0917	Došnica	watercourse	DIN MED	258.515	13.05	8.75	22.65	1259.8
16.0188	44.0026	Krka	watercourse	DIN MED	79.2168	14.05	9.75	23.55	1121.4
16.2846	45.8186	Zelina	watercourse	PAN	106.551	11.95	17.25	3.55	898.4
15.3564	45.6453	Kupa	watercourse	DIN CON	130.964	11.65	16.75	3.45	1090.6
15.2493	45.4557	Kupa	watercourse	DIN CON	161.634	11.45	11.75	3.35	1178.3
15.5977	45.4872	Kupa	watercourse	PAN	105.184	11.85	11.95	3.65	1050.7
16.2878	45.2728	Petrinjčica	watercourse	PAN	222.096	11.35	11.55	3.35	1067.7
16.0168	45.4775	Golinja	watercourse	PAN	105.864	11.95	12.15	3.75	978.7
15.8734	45.5265	Kremešnica	watercourse	PAN	102.017	11.85	17.15	3.55	985.3
15.6664	45.4811	Rečica	watercourse	PAN	105.201	11.85	11.95	3.65	1043.8
15.9074	45.5391	Kravaršćica	watercourse	PAN	104.728	11.85	17.15	3.55	962.2
15.9384	45.5188	Roženica	watercourse	PAN	109.319	11.85	17.15	3.65	960.8
15.9262	45.4726	Trepča	watercourse	PAN	105.492	11.95	12.15	3.75	998.4
15.9262	45.4726	Trepča	watercourse	PAN	105.492	11.95	12.15	3.75	998.4
15.7699	45.2101	Glina	watercourse	PAN	140.268	11.85	11.95	3.75	1074.5
15.789	45.5322	Kupčina	watercourse	PAN	103.312	11.85	17.15	3.55	981.7
15.6452	45.6333	Reka 2	watercourse	PAN	114.91	11.75	17.05	3.45	955.8
15.5457	45.2525	Korana	watercourse	DIN CON	141.15	11.55	11.85	3.55	1234.2
15.5903	45.121	Korana	watercourse	DIN CON	215.075	11.25	11.55	3.25	1337
15.7592	45.2556	Brusovača	watercourse	PAN	195.993	11.15	11.45	3.15	1180.4
15.5896	45.0796	Slunjčica	watercourse	DIN CON	241.791	10.95	11.35	2.95	1491.7
15.5598	45.4659	Mrežnica	watercourse	DIN CON	111.225	11.85	11.95	3.65	1128.3
15.2748	45.2243	Zagorska Mrežnica	watercourse	DIN CON	314.672	10.95	11.25	2.85	1531.8
15.5819	45.7417	Žumberačka reka	watercourse	PAN	353.41	9.75	14.85	1.85	1359.7
15.106	45.3578	Dobra	watercourse	DIN CON	354.355	10.35	10.65	2.25	1547.1
15.2003	45.2683	Gornja Dobra	watercourse	DIN CON	320.914	10.75	11.05	2.65	1547.9
15.1119	45.3413	Ribnjak	watercourse	DIN CON	354.974	10.35	10.75	2.35	1553.1
15.6285	45.4682	Trebinja	watercourse	PAN	109.2	11.75	11.95	3.55	1070.5
15.7247	45.1965	Ruševica	watercourse	PAN	146.319	11.65	11.85	3.55	1126.9
15.8228	45.8348	Krapina	watercourse	PAN	121.519	11.75	16.95	3.35	916.6
16.0651	46.1488	Reka 1	watercourse	PAN	255.532	10.85	20.25	2.75	1018
16.3115	46.0352	Presečno	watercourse	PAN	139.755	11.45	20.05	3.25	849.8
16.8156	46.3449	Kotoripski kanal	watercourse	PAN	132.139	11.35	20.95	3.05	749.2
16.7238	46.1959	Gliboki potok	watercourse	PAN	148.494	11.35	20.85	3.05	876.1
15.0754	45.4845	Kupa	watercourse	DIN CON	181.794	11.05	11.35	2.85	1404.8
14.7745	45.5074	Kupa	watercourse	DIN CON	252.582	10.95	11.25	2.75	1488.5
14.7006	45.505	Kupa	watercourse	DIN CON	304.024	10.45	10.85	2.45	1532.8
14.8568	45.4641	Kupica	watercourse	DIN CON	219.098	11.45	11.75	3.15	1420
14.8536	45.4501	Curak	watercourse	DIN CON	229.92	11.25	11.65	3.05	1443.5
14.6996	45.5257	Čabranka	watercourse	DIN CON	289.508	10.95	11.25	2.75	1386.8
14.805	45.4755	Velika Belica	watercourse	DIN CON	233.162	11.35	11.65	3.15	1523.3
14.6356	45.5162	Gerovčica	watercourse	DIN CON	571.367	9.65	10.05	1.75	1753.3
14.9087	45.4761	Čedanj	watercourse	DIN CON	215.625	11.15	11.45	2.95	1304.4
15.2956	44.8265	Gacka	watercourse	DIN CON	450.03	10.65	11.05	20.05	1547.6
14.4497	45.3786	Rječina	watercourse	DIN MED	238.294	11.95	7.75	21.05	1783.2
14.4178	45.4026	Rječina	watercourse	DIN MED	289.591	11.65	7.45	20.75	1760.1
14.4482	45.3566	Rječina	watercourse	DIN MED	146.242	12.15	8.05	21.25	1719.9
16.1094	44.4171	Joševica	watercourse	DIN CON	375.46	11.15	6.85	20.45	1179.4
16.6481	43.7762	Rumin	watercourse	DIN MED	299.257	12.95	8.65	22.45	1077.8
17.6391	43.0061	Mislina	watercourse	DIN MED	4.15712	15.35	11.25	24.65	1279
16.0836	44.1255	Kobilica	watercourse	DIN MED	252.67	12.95	8.65	22.55	1320.3
16.0334	44.0923	Zrmanja	watercourse	DIN MED	198.83	13.55	9.15	23.15	1178.5
15.94	44.1076	Zrmanja	watercourse	DIN MED	123.378	14.15	9.65	23.75	1090
15.7476	44.3419	Ričica	watercourse	DIN CON	554.315	10.65	6.45	19.85	1402.9
16.0711	44.1469	Zrmanja	watercourse	DIN MED	266.254	13.05	8.65	22.55	1394.1
15.9094	44.1928	Krupa	watercourse	DIN MED	123.291	13.45	8.85	23.15	1210.9
15.7989	43.8905	Bribišnica	watercourse	DIN MED	96.098	14.65	11.05	23.35	972.2
16.3146	43.7911	Vrba	watercourse	DIN MED	288.512	13.45	9.45	22.75	1249.1
16.0947	44.0106	Krka	watercourse	DIN MED	206.978	13.65	9.35	23.15	1244.3
16.1869	44.0409	Butižnica	watercourse	DIN MED	219.347	13.35	9.05	22.95	1276.2
15.9652	43.8025	Krka	watercourse	DIN MED	43.1387	15.15	11.45	24.15	1053.9
15.616	44.8787	Kozjak	stagnant	DIN CON	543.614	9.65	10.15	1.75	1759.7
15.6087	44.8774	Galovac	stagnant	DIN CON	568.27	9.65	10.15	1.75	1759.7
15.6096	44.8946	Milanovac	stagnant	DIN CON	531.35	9.65	10.15	1.65	1747.2
18.8005	45.6082	Sakadaš	stagnant	PAN	80.9161	11.85	20.15	3.15	684.3
18.7373	45.59	Biljsko jezero	stagnant	PAN	81.5178	11.85	20.25	3.15	696.9
15.2265	45.2286	Jezero Sabljaci	stagnant	DIN CON	319.211	10.85	11.25	2.85	1601.1
15.227	45.2222	Jezero Sabljaci	stagnant	DIN CON	319.224	10.85	11.25	2.85	1620.2
16.2227	44.0989	Akumulacija Golubić	stagnant	DIN MED	308.49	13.05	8.65	22.55	1240.8
16.2227	44.0989	Akumulacija Golubić	stagnant	DIN MED	308.49	13.05	8.65	22.55	1240.8
16.706	43.5705	Akumulacija Prančević	stagnant	DIN MED	271.15	13.85	10.35	22.45	1316.1
16.0376	44.0096	Brljansko jezero	stagnant	DIN MED	187.072	13.75	9.55	23.25	1156.9
15.1112	44.9436	Akumulacija Gusić	stagnant	DIN CON	426.488	10.75	11.25	20.45	1604.1
15.1112	44.9436	Akumulacija Gusić	stagnant	DIN CON	426.488	10.75	11.25	20.45	1604.1
15.7476	44.2048	Akumulacija Donji bazen, Razovac	stagnant	DIN MED	8.27285	14.25	9.45	24.15	1231.8
17.117	43.4736	Prološko blato	stagnant	DIN MED	265.624	13.75	9.35	23.25	1286.6
14.5604	45.0772	Akumulacija Ponikve	stagnant	DIN MED	17.1859	14.25	14.95	22.85	1511.2
17.4262	43.0811	Jezero Oćuša	stagnant	DIN MED	1.40382	15.65	11.75	24.75	1226.8
15.969	43.8595	Visovačko jezero	stagnant	DIN MED	48.6533	15.25	11.25	24.45	1067.4
15.2662	44.6764	Akumulacija Kruščica	stagnant	DIN CON	607.916	10.55	6.25	19.85	1665
18.2109	45.7575	Ribnjaci Donji Miholjac	stagnant	PAN	99.2387	11.55	21.35	3.15	726.1
